# Supplementary material for: The electronic and transport properties of two-dimensional conjugated polymer networks including disorder
Source: Royal Society of Chemistry journal article supplement (doi:10.1039/c5nr06825h), 2015-12-09
Supplement: c5nr06825h4.pdf [file c5nr06825h4.pdf]

# Supplementary Materials: Electronic and transport properties of two-dimensional conjugated polymer networks including disorder.

1

Jean-Joseph Adjizian,\* Aurélien Lherbier, Simon Dubois, Andrés Rafael  
Botello-Méndez, and Jean-Christophe Charlier

*Université catholique de Louvain, Institute of Condensed Matter and Nanosciences,  
Chemin des étoiles 8, 1348 Louvain-la-neuve, Belgium*

E-mail: jean.adjizian@uclouvain.be

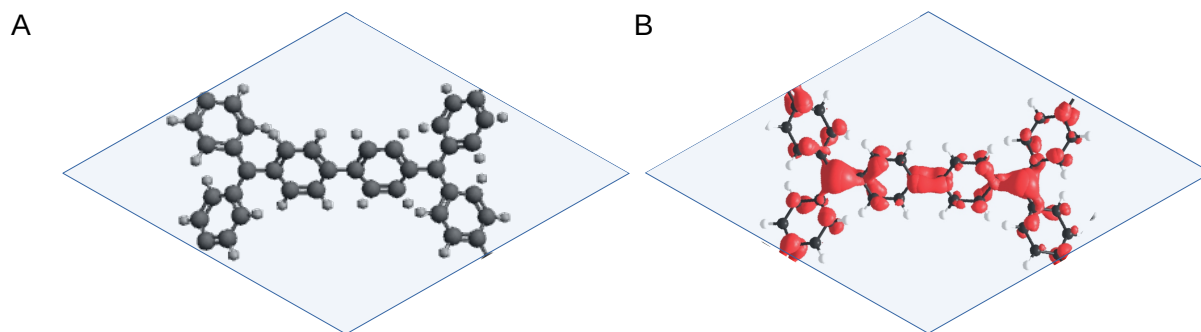

Figure 1: (A) A pristine 2DCP cell and (B) the corresponding wave function at the highest occupied state (at K-point).

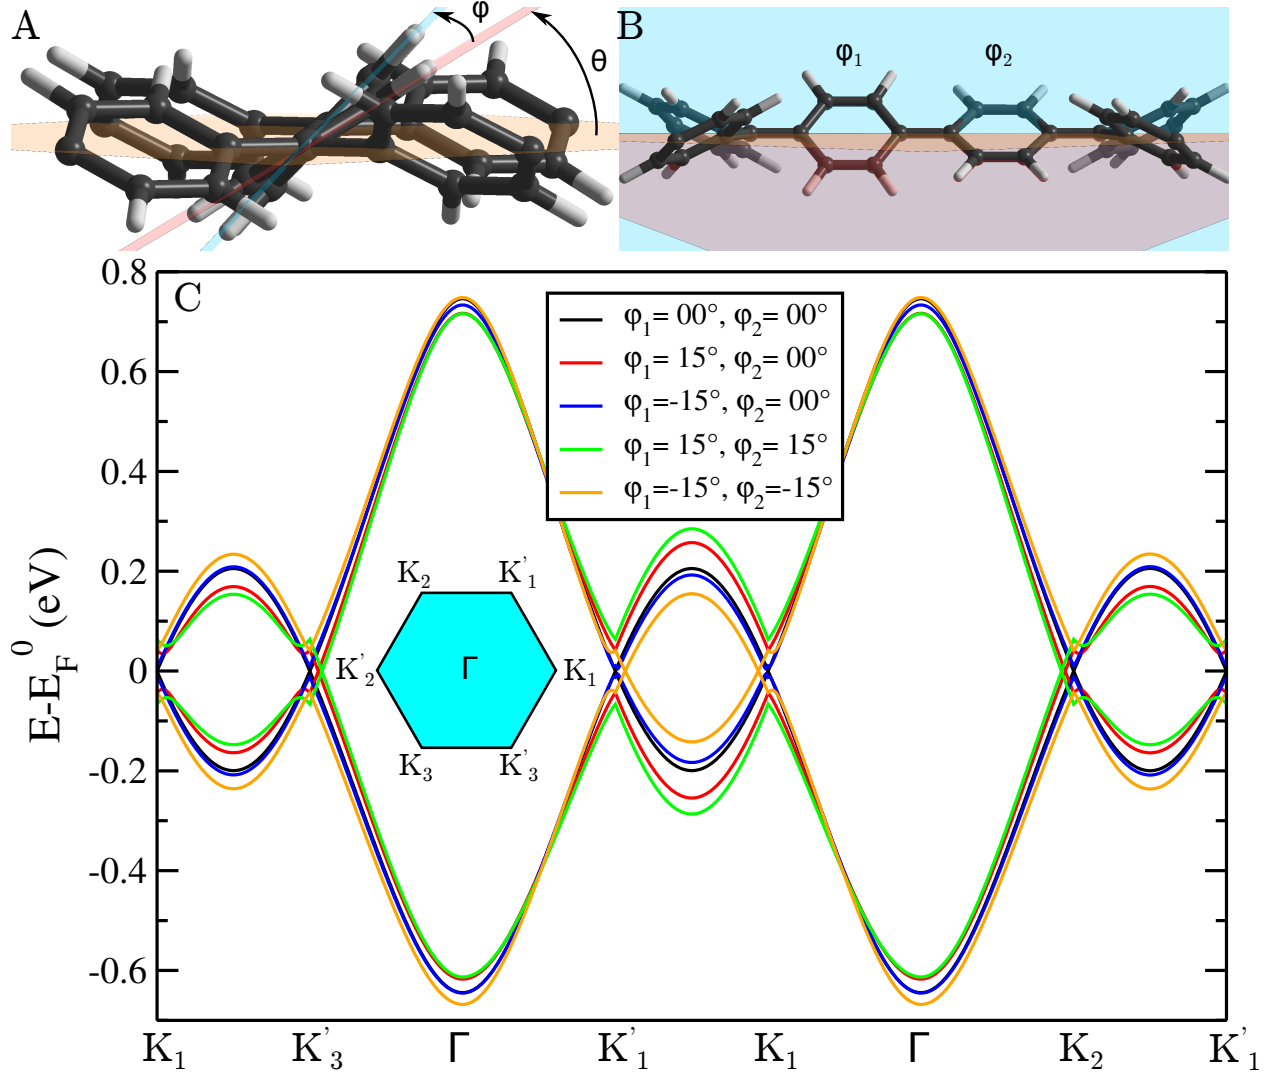

Figure 2: Effect of various benzene rotations on the electronic properties of the 2D conjugated polymer network. (A) Side view along a branch axis of the primitive cell,  $\theta$  represents the dihedral angle between a branch and the XY plan.  $\varphi$  represents the dihedral angle between benzene rings and  $\theta$ . (B) Side view perpendicular to the branch axis in (A).  $\varphi_1$  represents the dihedral angle of the first benzene ring and  $\varphi_2$  represents the dihedral angle of the second benzene ring with respect to  $\theta$ . (C) First-principles electronic band structures for structures with different rotational angles. The black curve is the ground state band structure ( $\theta=30.8^\circ$  and  $\varphi_1=\varphi_2=0^\circ$ ), the red and blue curves are the band structures with a single benzene ring rotated by  $+15^\circ$  ( $\varphi_1=15^\circ, \varphi_2=0^\circ$ ) and  $-15^\circ$  ( $\varphi_1=-15^\circ, \varphi_2=0^\circ$ ) respectively. The green and orange curves are the band structures with a branch rotated by  $+15^\circ$  ( $\varphi_1=\varphi_2=15^\circ$ ) and  $-15^\circ$  ( $\varphi_1=\varphi_2=-15^\circ$ ).

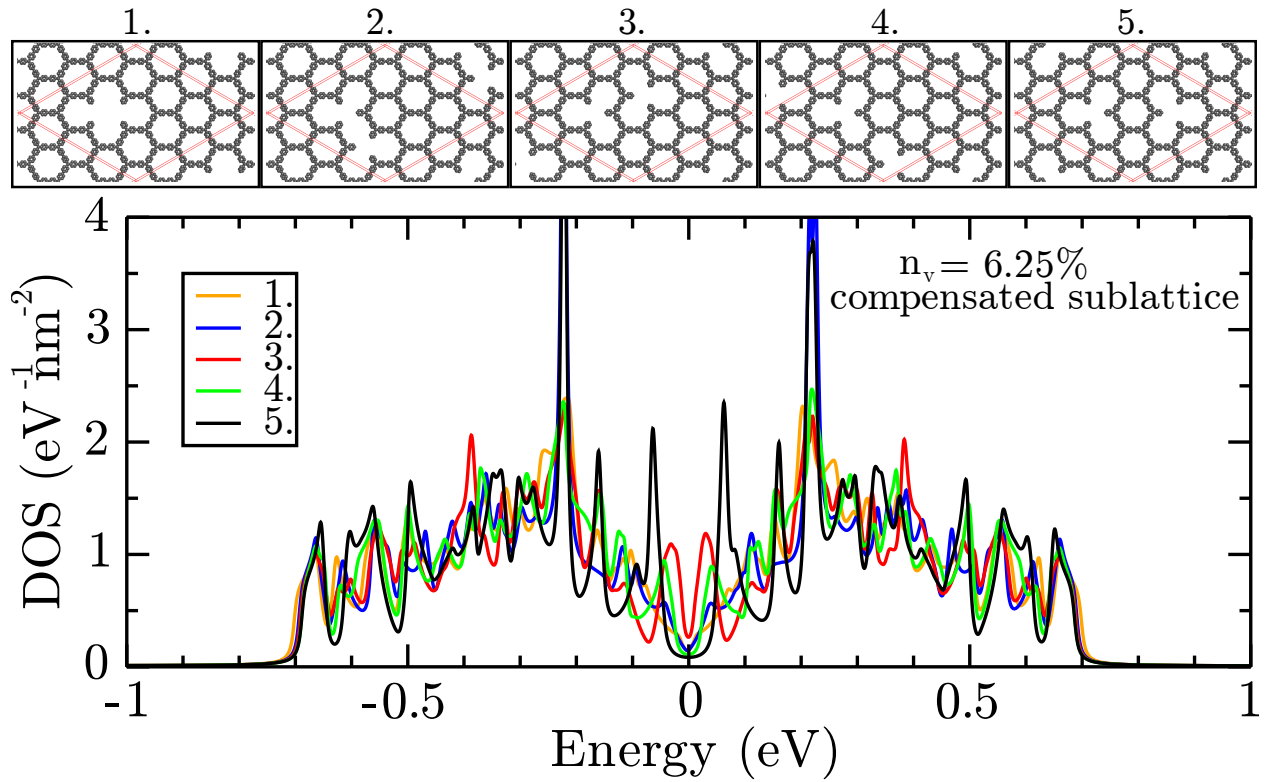

Figure 3: A 4x4 2DCP cell containing 6.25% of vacancies. For each structure, from 1 to 5, there are two vacancies: one located on the sub-lattice "A" and one on the sub-lattice "B". These five different configurations are investigated and their respective DOS are shown.
