# Supplementary figures and images for: The electronic and transport properties of two-dimensional conjugated polymer networks including disorder
Source: Royal Society of Chemistry journal article supplement (doi:10.1039/c5nr06825h), 2015-12-09

A

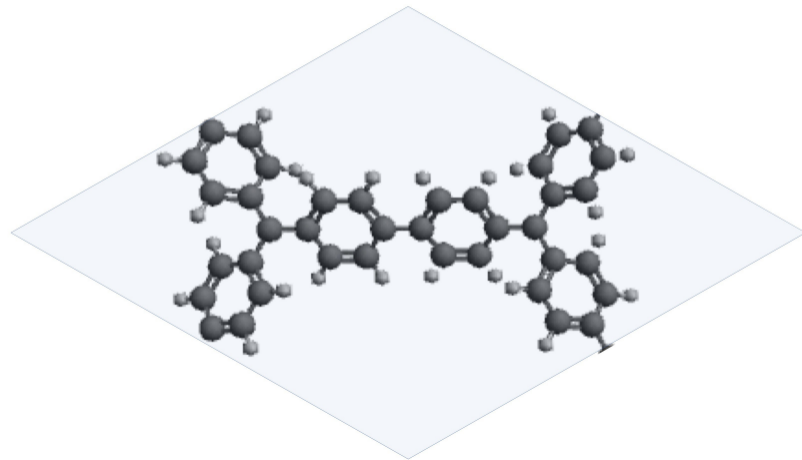

B

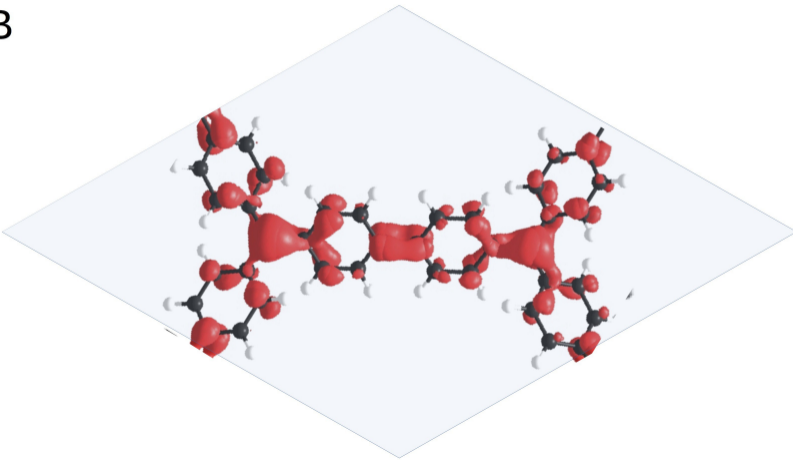

Supplement: c5nr06825h1.pdf [file c5nr06825h1.pdf]

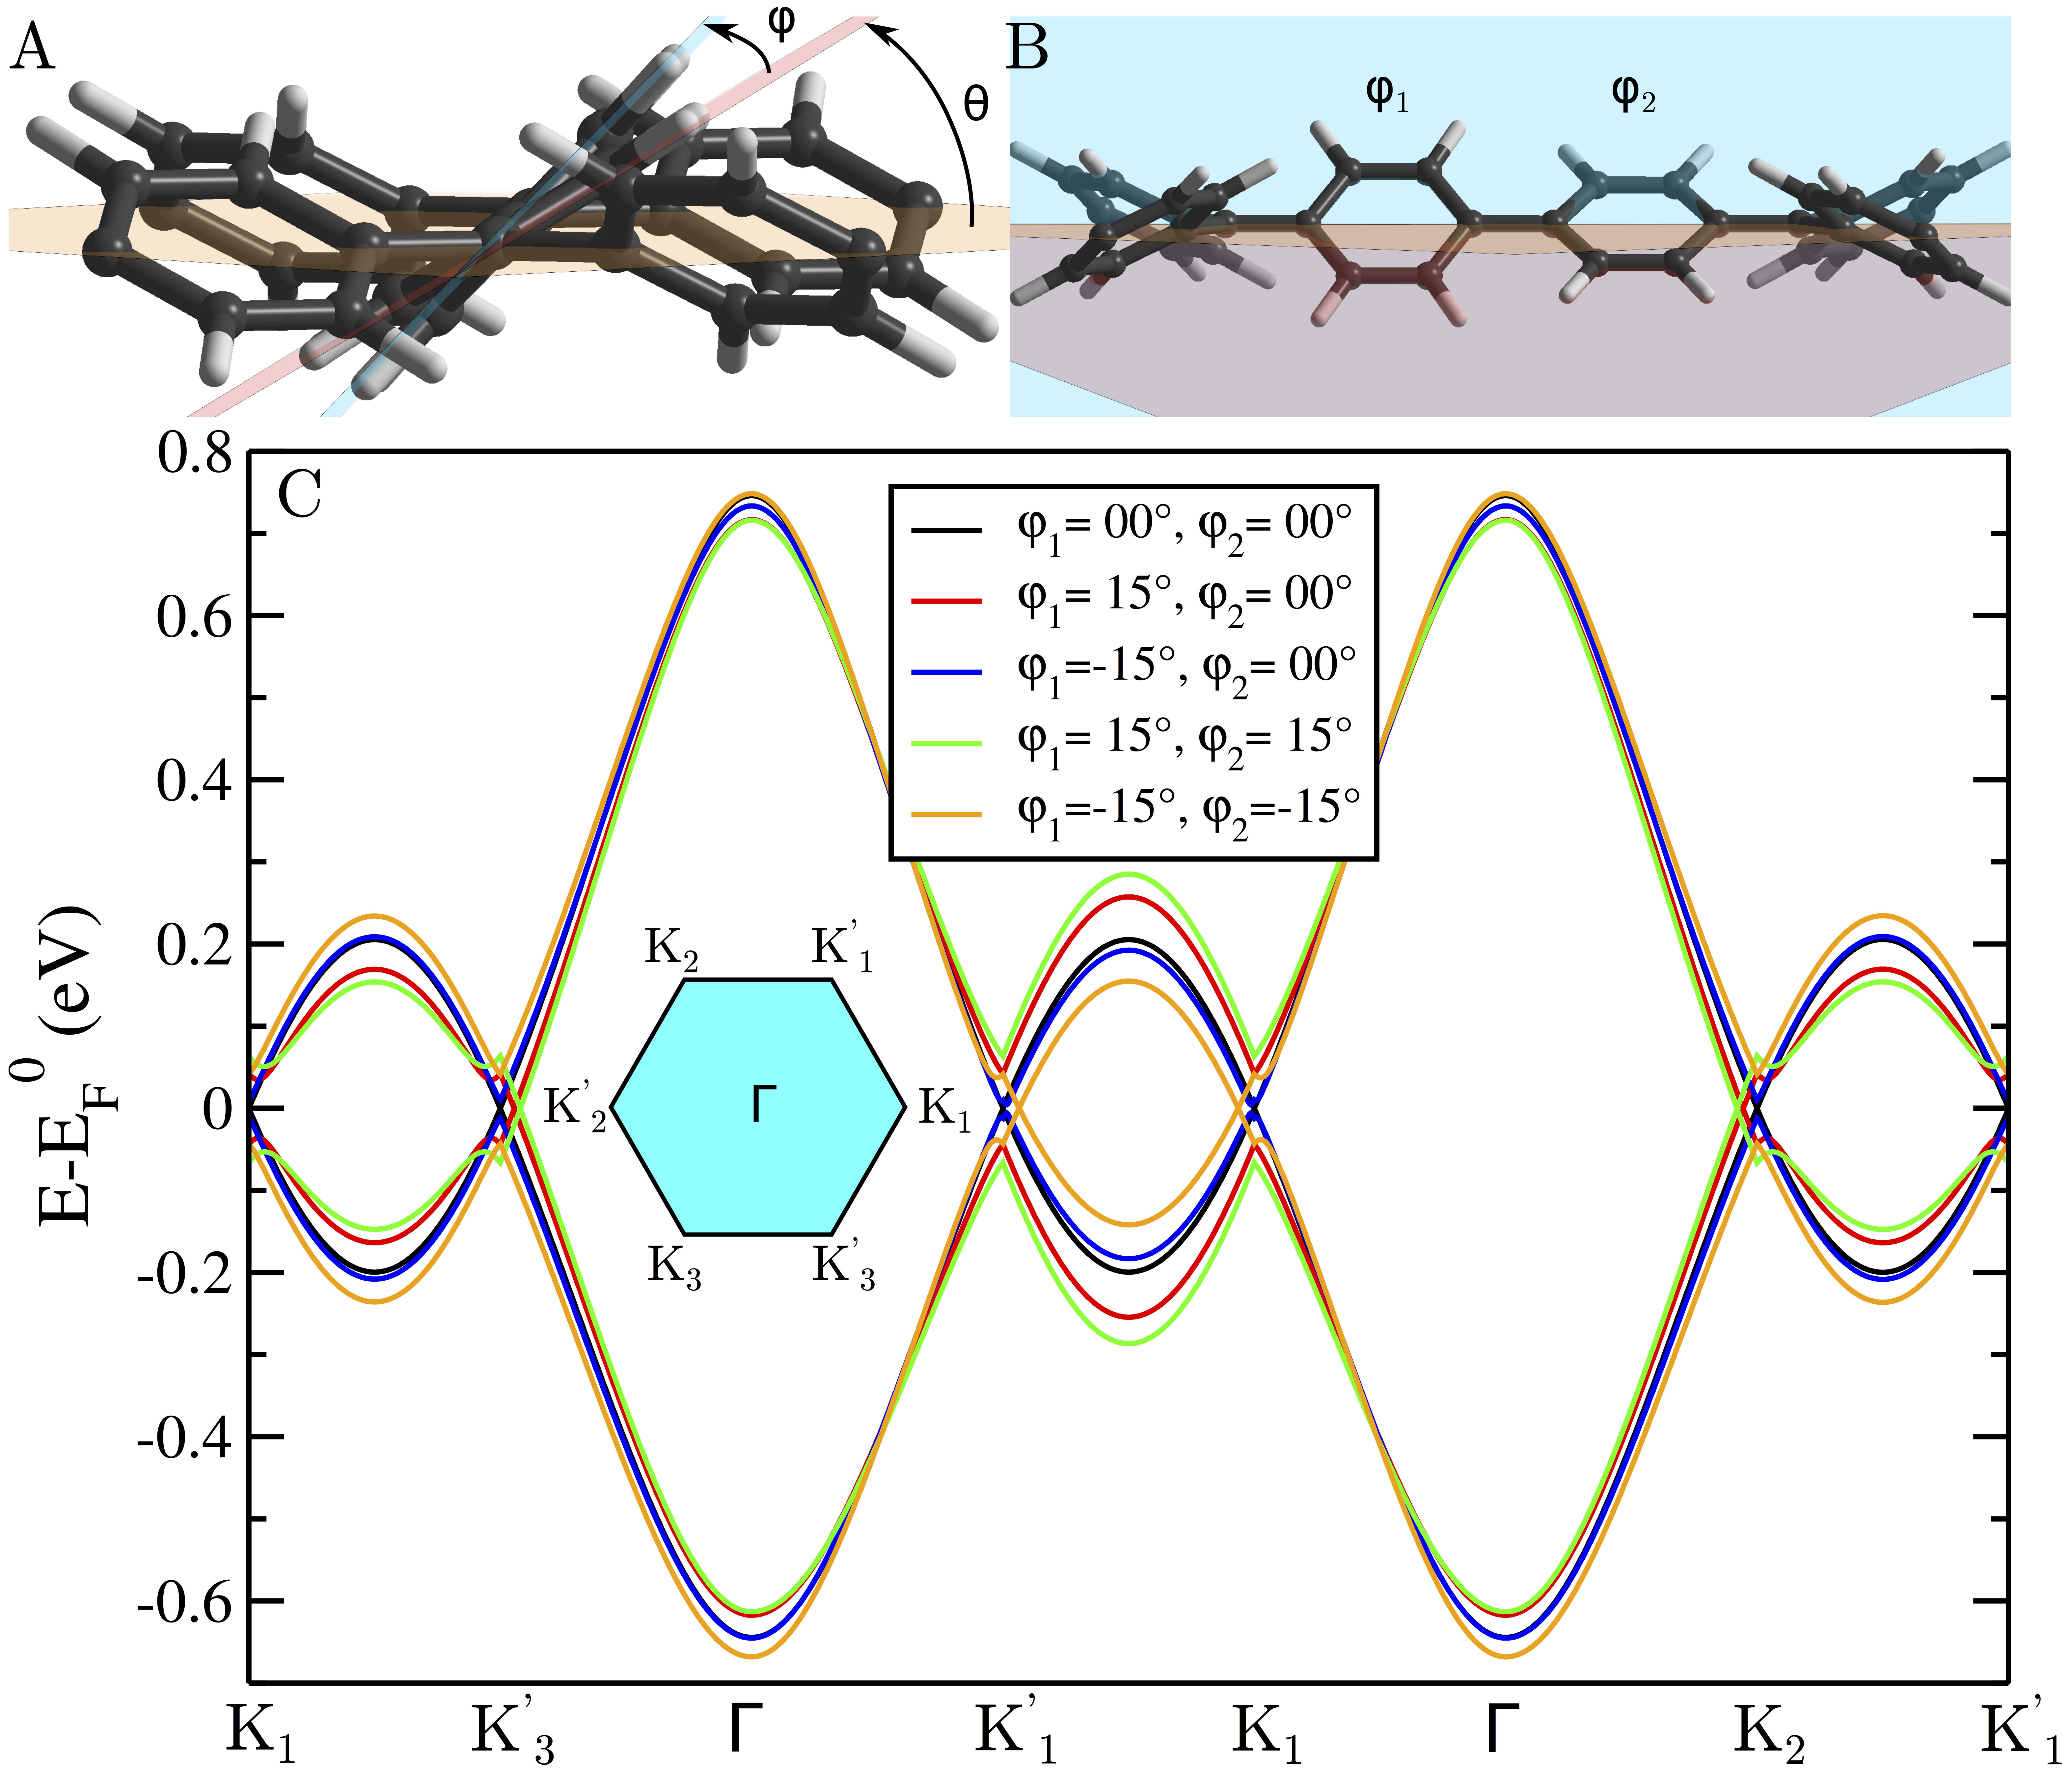

Supplement: c5nr06825h2.pdf [file c5nr06825h2.pdf]

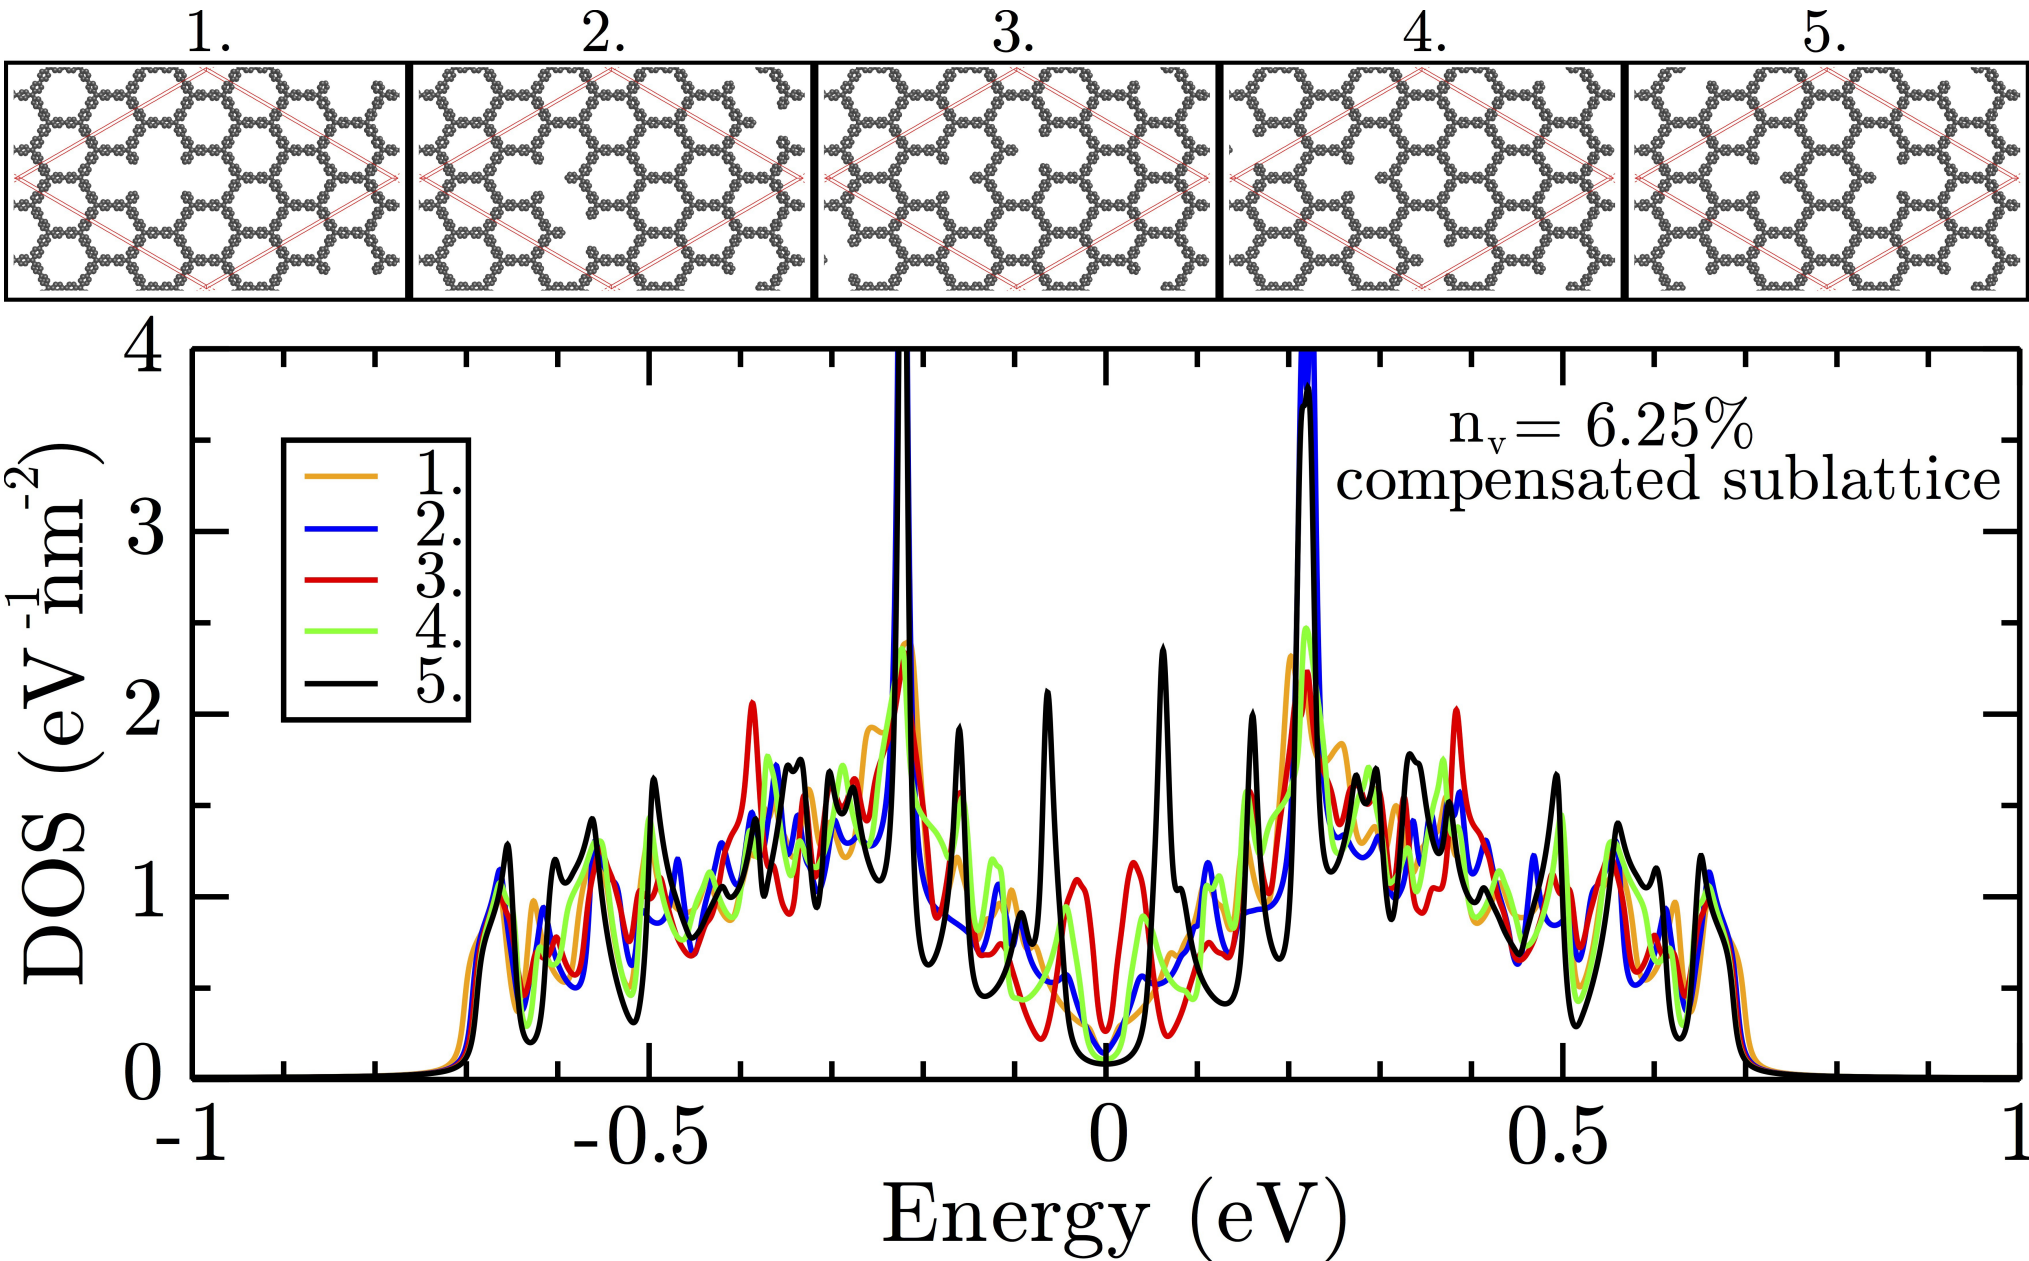

Supplement: c5nr06825h3.pdf [file c5nr06825h3.pdf]
